# Supplementary material for: The synthesis of ZnS@MoS2 hollow polyhedrons for enhanced lithium storage performance
Source: Royal Society of Chemistry journal article supplement (doi:10.1039/c8ce01306c), 2018-01-01
Supplement: c8ce01306c1.pdf [file c8ce01306c1.pdf]

## Supporting Information

### The synthesis of ZnS@MoS<sub>2</sub> hollow polyhedrons for an enhanced lithium storage performance

Yueying, Zhao,<sup>a, b</sup> Wanwan Wang,<sup>a, b</sup> Mengna Chen,<sup>a, b</sup> Ruojie, Wang,<sup>a, b</sup>

Zhen, Fang<sup>\*, a, b</sup>

<sup>a</sup> College of Chemistry and Materials Science, Anhui Normal University, Wuhu 241000, P. R. China.

<sup>b</sup> Key Laboratory of Functional Molecular Solids, Ministry of Education, Anhui Normal University, Wuhu 241000, P. R. China.

\* Zhen Fang: Corresponding author, fzfsn@mail.ahnu.edu.cn.

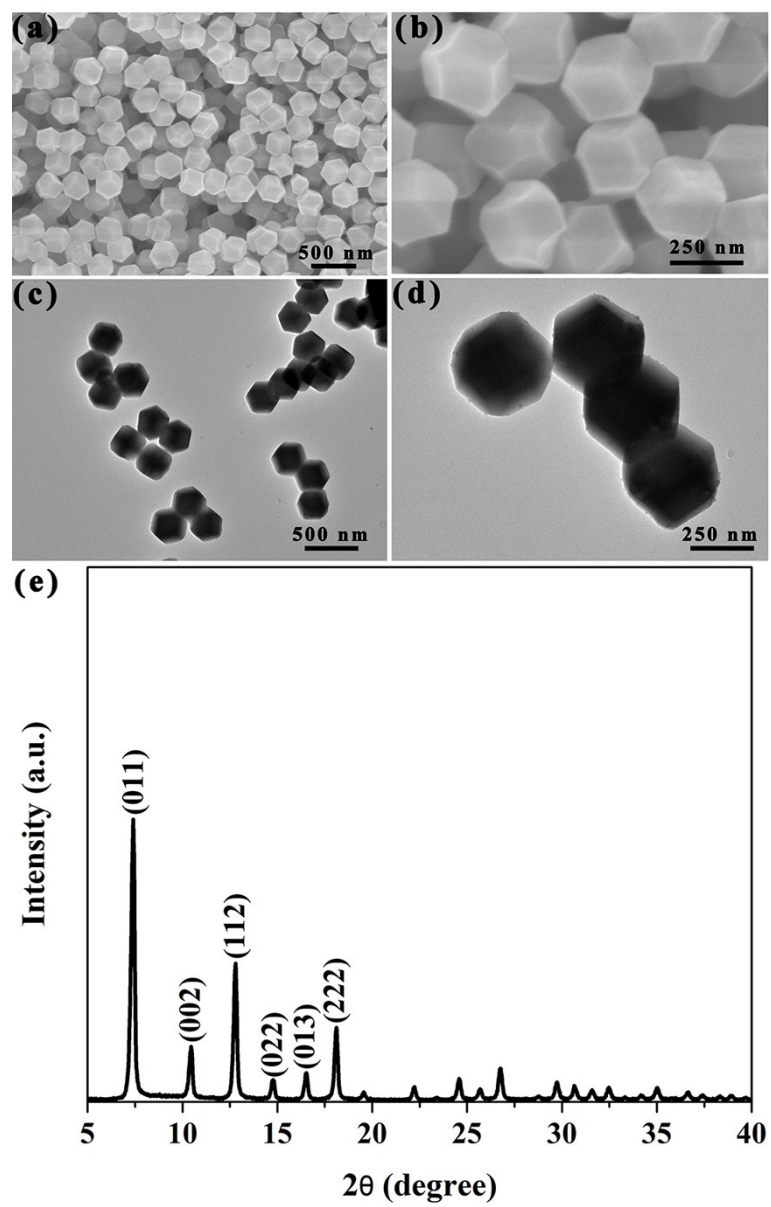

**Figure S1.** (a-b) SEM images and (c-d) TEM image of ZIF-8. (e) XRD pattern of

ZIF-8.

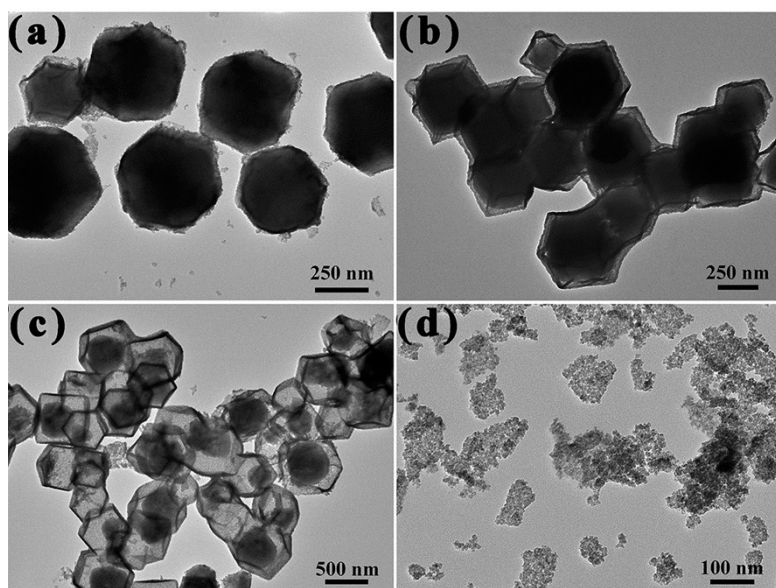

**Figure S2.** TEM images of the products obtained at different reflow times, (a) 1 h (b) 2 h (c) 4 h (d) 6 h.

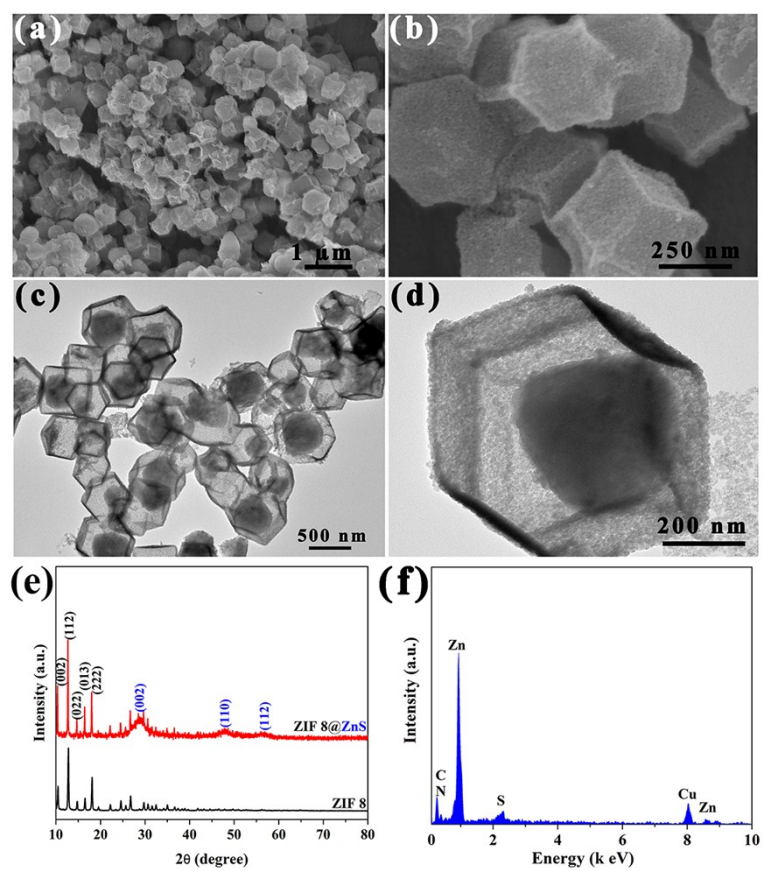

**Figure S3.** (a-b) SEM, (c-d) TEM of ZIF-8@ZnS core-shell (e) XRD patterns (f) EDS spectrum

of ZIF-8@ZnS; (f) EDX of ZIF-8@ZnS.

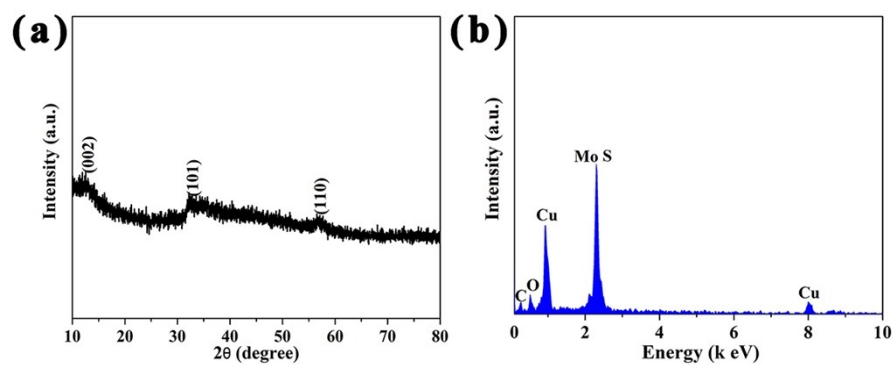

**Figure S4.** (a) XRD profile and (b) EDX pattern of the obtained MoS<sub>2</sub> without using ZIF-8@ZnS template.

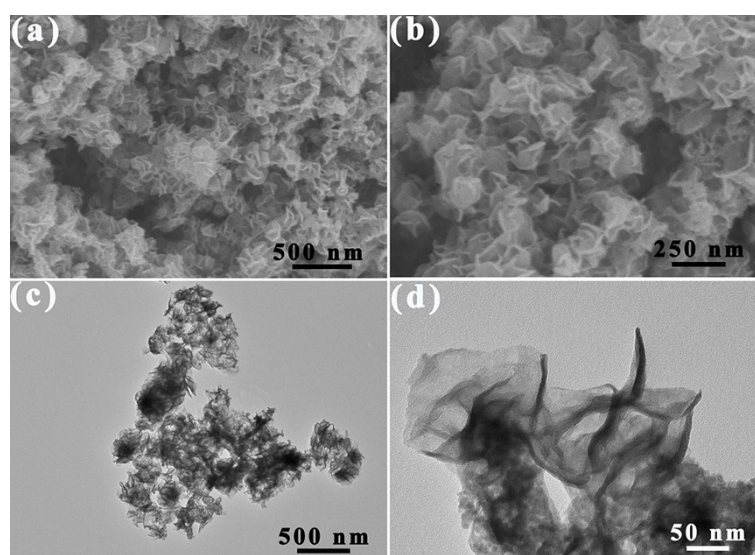

**Figure S5.** (a-b) SEM images and (c-d) TEM images of MoS<sub>2</sub>.

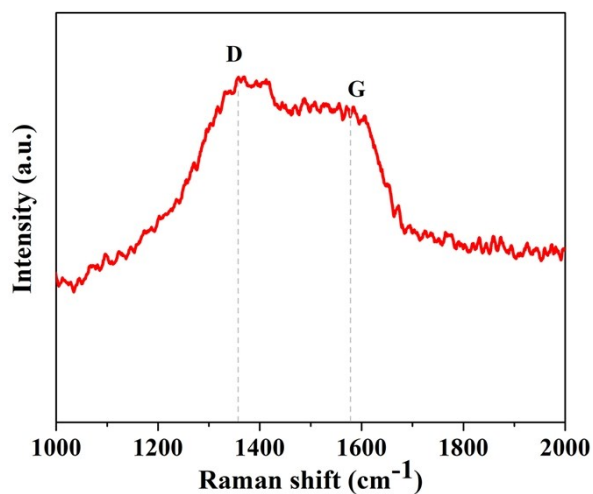

**Figure S6.** the Raman spectrum of ZnS@MoS<sub>2</sub> composites.

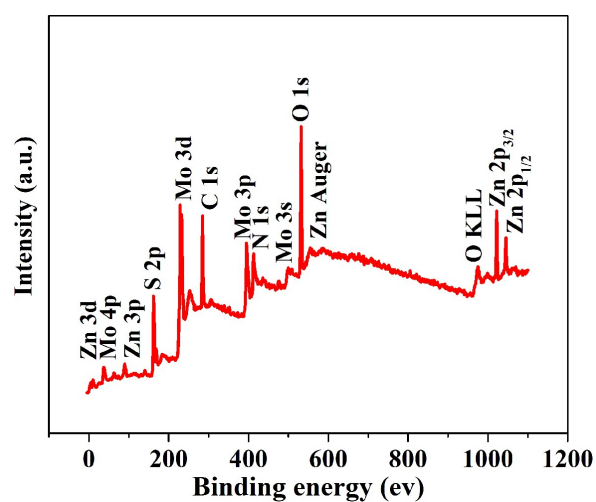

**Figure S7.** XPS survey spectrum of ZnS@MoS<sub>2</sub> hollow polyhedrons.

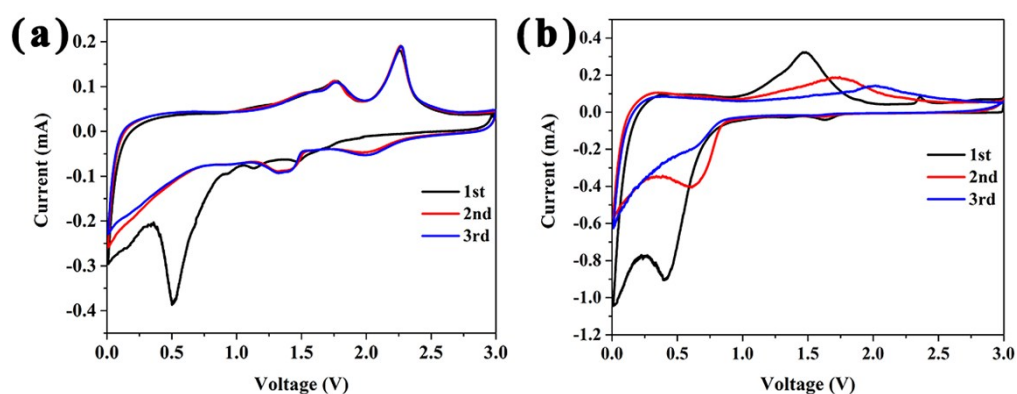

**Figure S8.** The initial three CV curves of (a) MoS<sub>2</sub> and (b) ZnS electrodes in the potential range of 0.01-3.0 V (vs. Li/Li<sup>+</sup>) at a scan rate of 0.1 mV s<sup>-1</sup>.

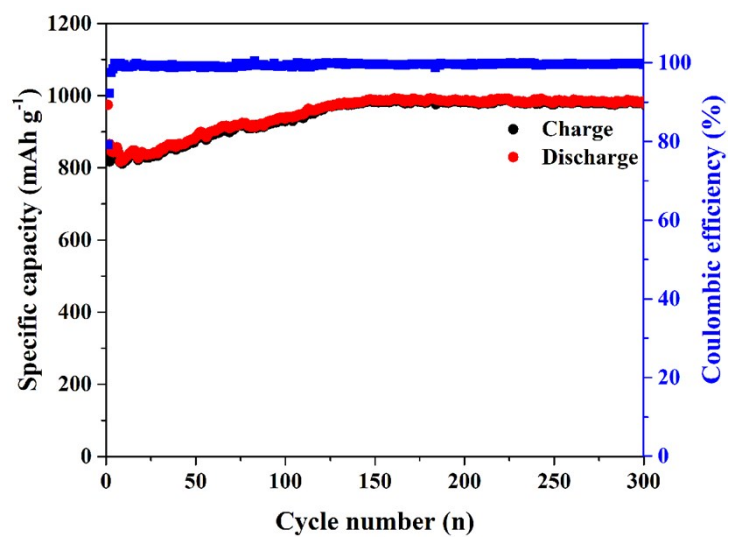

**Figure S9.** Long-term cycling performance and CE of the ZnS@MoS<sub>2</sub> hollow polyhedron at a current density of 500 mA g<sup>-1</sup>.

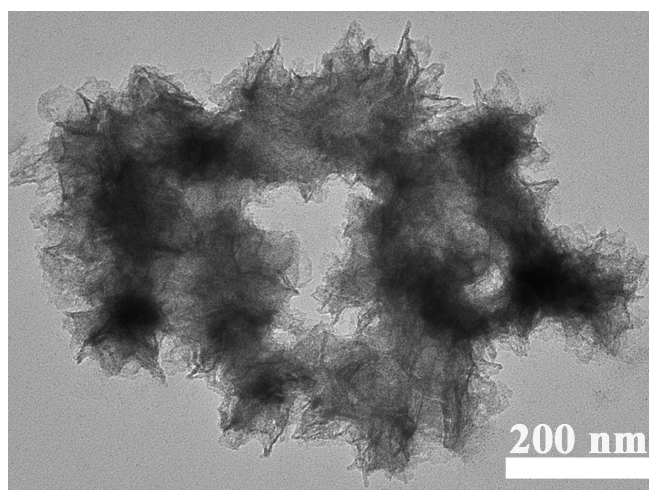

**Figure S10.** TEM image of the ZnS@MoS<sub>2</sub> hollow polyhedron after cycling.

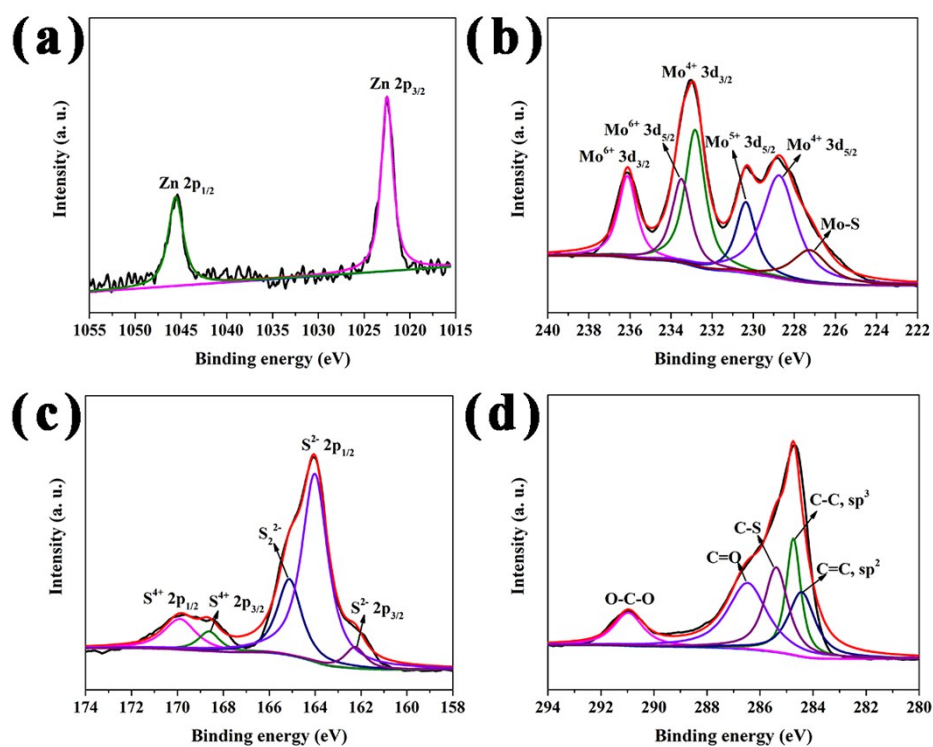

**Figure S11.** High-resolution XPS spectra of the (a) Zn 2p, (b) Mo 3d, (c) S 2p, and (d) C 1s after cycling.

**Table S1.** Impedance parameters derived using equivalent circuit model for electrodes before and after 200 cycles at  $0.2 \text{ A g}^{-1}$ .

| Electrode                               | $R_s$ ( $\Omega$ ) | $R_{ct}$ ( $\Omega$ ) |
|-----------------------------------------|--------------------|-----------------------|
| ZnS@MoS <sub>2</sub> (before cycle)     | 5.698              | 51.401                |
| ZnS@MoS <sub>2</sub> (after 200 cycles) | 4.712              | 25.701                |

|                                     |        |         |
|-------------------------------------|--------|---------|
| ZnS (before cycle)                  | 11.569 | 168.182 |
| ZnS (after 200 cycles)              | 7.464  | 95.981  |
| MoS <sub>2</sub> (before cycle)     | 6.825  | 98.332  |
| MoS <sub>2</sub> (after 200 cycles) | 4.046  | 69.597  |
